# Supplementary material
Source: HighWire-hosted journal article supplement (https://gut.bmj.com/content/gutjnl-2021-326070)
Supplement: inline-supplementary-material-3 [file inline-supplementary-material-3.xlsx]

## Sheet: Sheet1
Table S1. Demographic, clinical and pathological information of the donors for single-cell RNA-sequencing
ID	Sex	Age	Tumor location	Procedure	T	N	M	AJCC stage	Differentiation
HC-1	M	65	-	-	-	-	-	-	-
HC-2	F	61	-	-	-	-	-	-	-
CP-1	M	48	-	-	-	-	-	-	-
CP-2	F	59	-	-	-	-	-	-	-
PDAC-1	F	46	Head	PD	T2	N1	M0	IIB	Poor
PDAC-2	M	79	Body/tail	DP	T2	N1	M0	IIB	Poor
PDAC-3	M	68	Body/tail	TP	T3	N1	M0	IIB	Well-moderate
PDAC-4	F	61	Head	PD	T3	N1	M0	IIB	Poor
PDAC-5	F	73	Head	TP	T4	N1	M0	III	Poor
