# Supplementary material
Source: HighWire-hosted journal article supplement (https://gut.bmj.com/content/gutjnl-2021-326070)
Supplement: inline-supplementary-material-4 [file inline-supplementary-material-4.xlsx]

## Sheet: Sheet1
Table S2. Demographic, clinical and pathological information of the PDAC patients in validation cohorts
Cohort	Experiment	Sex	Age	Tumor location	Procedure	T	N	M	AJCC stage	Differentiation
Validation cohort 1	RNA-seq	M	50	Head	PD	T3	N1	M0	IIB	Poor
Validation cohort 1	RNA-seq	F	71	Head	PD	T3	N1	M0	IIB	Well-moderate
Validation cohort 1	RNA-seq	M	54	Body/tail	Appleby	T4	N1	M0	III	Poor
Validation cohort 1	RNA-seq	F	66	Body/tail	DP	T3	N0	M0	IIA	Well
Validation cohort 1	RNA-seq	F	84	Body/tail	DP	T3	N0	M0	IIA	Moderate
Validation cohort 1	RNA-seq	M	69	Head	PD	T3	N1	M0	IIB	Poor
Validation cohort 1	RNA-seq	M	55	Head	PD	T4	N0	M0	III	Poor
Validation cohort 1	RNA-seq	F	46	Head	TP	T4	N1	M0	III	Well-moderate
Validation cohort 1	RNA-seq	F	75	Head	PD	T3	N1	M0	IIB	Moderate
Validation cohort 1	Proteomics	F	71	Head	PD	T3	N1	M0	IIB	Moderate
Validation cohort 1	Proteomics	F	76	Head	PD	T4	N0	M1	IV	Poor
Validation cohort 1	Proteomics	F	41	Head	PD	T3	N0	M0	IIA	Well-moderate
Validation cohort 1	Proteomics	M	61	Head	PD	T3	N0	M0	IIA	Moderate
Validation cohort 1	Proteomics	M	84	Head	PD	T3	N1	M0	IIB	Poor
Validation cohort 1	Proteomics	F	65	Head	PD	T3	N0	M0	IIA	Moderate
Validation cohort 1	Proteomics	M	62	Head	PD	T3	N1	M0	IIB	Well-moderate
Validation cohort 1	Metabolomics	M	58	Head	PD	T3	N1	M0	IIB	Well-moderate
Validation cohort 1	Metabolomics	M	65	Head	PD	T3	N0	M0	IIA	Poor
Validation cohort 1	Metabolomics	F	67	Body/tail	DP	T3	N0	M0	IIA	Well-moderate
Validation cohort 1	qPCR	F	69	Body/tail	DP	T4	M1	N1	IV	Poor
Validation cohort 1	qPCR	F	65	Head	PD	T4	M0	N1	III	Poor
Validation cohort 1	qPCR	F	57	Head	PD	T3	M1	N1	IV	Well-moderate
Validation cohort 1	qPCR	M	67	Head	PD	T3	M0	N1	IIb	Poor
Validation cohort 1	qPCR	M	52	Body/tail	DP	T3	M0	N0	IIa	Well-moderate
Validation cohort 2	IHC	F	68	Head	PD	T2	N0	M0	IB	Well-moderate
Validation cohort 2	IHC	M	63	Body/tail	DP	T3	N0	M1	IV	Poor
Validation cohort 2	IHC	M	53	Head	PD	T2	N0	M0	IB	Poor
Validation cohort 2	IHC	M	69	Head	PD	T1	N0	M0	IA	Well-moderate
Validation cohort 2	IHC	M	38	Head	PD	T2	N1	M1	IV	Well-moderate
Validation cohort 2	IHC	M	66	Head	PD	T2	N2	M0	III	Well-moderate
Validation cohort 2	IHC	M	62	Head	PD	T2	N0	M0	IB	Well-moderate
Validation cohort 2	IHC	M	62	Head	PD	T2	N0	M0	IB	Well-moderate
Validation cohort 2	IHC	M	68	Head	PD	T2	N0	M0	IB	Poor
Validation cohort 2	IHC	M	63	Body/tail	DP	T2	N0	M0	IB	Poor
Validation cohort 2	IHC	M	62	Head	PD	T2	N0	M0	IB	Well-moderate
Validation cohort 2	IHC	M	64	Head	PD	T2	N1	M0	IIB	Poor
Validation cohort 2	IHC	M	60	Body/tail	DP	T2	N0	M0	IB	Poor
Validation cohort 2	IHC	F	39	Body/tail	DP	T2	N0	M0	IB	Well-moderate
Validation cohort 2	IHC	F	71	Body/tail	DP	T4	N0	M0	III	Poor
Validation cohort 2	IHC	M	63	Body/tail	DP	T2	N1	M0	IIB	Poor
Validation cohort 2	IHC	F	75	Body/tail	DP	T3	N0	M1	IV	Poor
Validation cohort 2	IHC	M	47	Head	PD	T2	N0	M0	IB	Poor
Validation cohort 2	IHC	F	55	Body/tail	DP	T3	N0	M0	IIA	Well-moderate
Validation cohort 2	IHC	F	48	Head	PD	T2	N2	M0	III	Poor
Validation cohort 2	IHC	F	53	Body/tail	Appleby	T4	N0	M1	IV	Poor
Validation cohort 2	IHC	M	73	Head	PD	T2	N1	M0	IIB	Well-moderate
Validation cohort 2	IHC	F	70	Head	PD	T1	N1	M0	IIB	Poor
Validation cohort 2	IHC	F	55	Head	PD	T1	N1	M0	IIB	Poor
Validation cohort 2	IHC	F	78	Head	PD	T1	N0	M0	IA	Poor
Validation cohort 2	IHC	F	59	Head	PD	T2	N0	M0	IB	Poor
Validation cohort 2	IHC	M	70	Head	PD	T1	N0	M0	IA	Poor
Validation cohort 2	IHC	F	40	Body/tail	DP	T3	N0	M0	IIA	Poor
Validation cohort 2	IHC	M	65	Body/tail	DP	T3	N0	M0	IIA	Poor
Validation cohort 2	IHC	M	40	Head	PD	T1	N0	M0	IA	Well-moderate
Validation cohort 2	IHC	M	65	Head	PD	T4	N0	M0	III	Poor
Validation cohort 2	IHC	M	59	Body/tail	DP	T3	N0	M0	IIA	Poor
Validation cohort 2	IHC	M	77	Head	PD	T2	N1	M0	IIB	Poor
Validation cohort 2	IHC	F	50	Head	PD	T2	N1	M0	IIB	Poor
Validation cohort 2	IHC	F	60	Head	PD	T2	N0	M0	IB	Poor
Validation cohort 2	IHC	M	61	Head	PD	T2	N0	M0	IB	Well-moderate
Validation cohort 2	IHC	M	61	Head	PD	T3	N0	M0	IIA	Poor
Validation cohort 2	IHC	F	82	Body/tail	DP	T3	N0	M0	IIA	Well-moderate
Validation cohort 2	IHC	M	74	Head	PD	T2	N1	M0	IIB	Poor
Validation cohort 2	IHC	M	77	Head	PD	T2	N1	M0	IIB	Poor
Validation cohort 2	IHC	F	67	Head	PD	T2	N0	M0	IB	Poor
Validation cohort 2	IHC	F	59	Body/tail	DP	T3	N1	M0	IIB	Poor
Validation cohort 2	IHC	F	76	Head	PD	T2	N0	M0	IB	Poor
Validation cohort 2	IHC	F	76	Head	PD	T2	N0	M0	IB	Poor
Validation cohort 2	IHC	F	65	Body/tail	DP	T2	N1	M0	IIB	Well-moderate
Validation cohort 2	IHC	M	56	Body/tail	DP	T2	N0	M0	IB	Poor
Validation cohort 2	IHC	F	52	Body/tail	DP	T3	N0	M0	IIA	Poor
Validation cohort 2	IHC	F	60	Head	PD	T2	N1	M0	IIB	Well-moderate
Validation cohort 2	IHC	F	67	Head	PD	T2	N1	M0	IIB	Poor
Validation cohort 2	IHC	M	63	Head	PD	T2	N1	M0	IIB	Poor
Validation cohort 2	IHC	M	66	Body/tail	DP	T3	N0	M0	IIA	Poor
Validation cohort 2	IHC	M	54	Body/tail	DP	T2	N1	M0	IIB	Well-moderate
Validation cohort 2	IHC	F	61	Head	PD	T2	N1	M0	IIB	Poor
Validation cohort 2	IHC	F	69	Head	PD	T3	N1	M0	IIB	Poor
Validation cohort 2	IHC	M	68	Head	PD	T4	N2	M0	III	Poor
Validation cohort 2	IHC	F	42	Body/tail	DP	T2	N1	M0	IIB	Poor
Validation cohort 2	IHC	M	62	Head	PD	T2	N1	M0	IIB	Poor
Validation cohort 2	IHC	F	58	Head	PD	T2	N1	M0	IIB	Poor
Validation cohort 2	IHC	M	58	Head	PD	T2	N0	M0	IB	Poor
Validation cohort 2	IHC	F	60	Head	PD	T2	N1	M0	IIB	Well-moderate
Validation cohort 2	IHC	M	58	Head	PD	T4	N1	M0	III	Poor
Validation cohort 2	IHC	M	69	Body/tail	DP	T3	N1	M0	IIB	Well-moderate
Validation cohort 2	IHC	M	58	Head	PD	T4	N2	M0	III	Poor
Validation cohort 2	IHC	F	61	Body/tail	DP	T3	N1	M0	IIB	Poor
Validation cohort 2	IHC	M	68	Head	PD	T4	N1	M0	III	Poor
Validation cohort 2	IHC	M	57	Body/tail	DP	T1	N1	M0	IIB	Well-moderate
Validation cohort 2	IHC	F	58	Head	PD	T2	N0	M0	IB	Poor
Validation cohort 2	IHC	F	76	Head	PD	T1	N0	M0	IA	Poor
Validation cohort 2	IHC	M	55	Head	PD	T4	N0	M1	IV	Poor
Validation cohort 2	IHC	F	66	Head	PD	T1	N2	M0	III	Well-moderate
Validation cohort 2	IHC	M	61	Head	PD	T3	N0	M0	IIA	Poor
Validation cohort 2	IHC	M	49	Head	PD	T2	N1	M0	IIB	Poor
Validation cohort 2	IHC	F	80	Head	PD	T2	N0	M0	IB	Poor
Validation cohort 2	IHC	F	75	Head	PD	T4	N1	M0	III	Poor
Validation cohort 2	IHC	M	63	Body/tail	DP	T2	N1	M0	IIB	Poor
Validation cohort 2	IHC	F	85	Head	PD	T2	N1	M0	IIB	Poor
Validation cohort 2	IHC	M	65	Head	PD	T4	N1	M0	III	Poor
Validation cohort 2	IHC	F	76	Body/tail	DP	T3	N0	M0	IIA	Poor
Validation cohort 2	IHC	M	61	Body/tail	DP	T4	N0	M0	III	Poor
Validation cohort 2	IHC	M	69	Head	PD	T2	N1	M0	IIB	Poor
Validation cohort 2	IHC	F	47	Body/tail	DP	T3	N1	M0	IIB	Poor
Validation cohort 2	IHC	M	66	Body/tail	DP	T2	N1	M0	IIB	Poor
Validation cohort 2	IHC	M	59	Head	PD	T2	N1	M0	IIB	Poor
Validation cohort 2	IHC	M	65	Head	PD	T2	N2	M0	III	Poor
Validation cohort 2	IHC	M	57	Head	PD	T1	N0	M0	IA	Poor
Validation cohort 2	IHC	M	48	Head	PD	T4	N1	M0	III	Poor
Validation cohort 2	IHC	F	71	Body/tail	DP	T2	N1	M0	IIB	Poor
Validation cohort 2	IHC	M	65	Body/tail	DP	T4	N1	M0	III	Poor
Validation cohort 2	IHC	M	62	Body/tail	DP	T2	N0	M0	IB	Poor
Validation cohort 2	IHC	F	69	Head	PD	T2	N1	M0	IIB	Poor
Validation cohort 2	IHC	M	56	Head	PD	T1	N1	M0	IIB	Poor
Validation cohort 2	IHC	F	79	Head	PD	T2	N0	M0	IB	Well-moderate
Validation cohort 2	IHC	M	52	Body/tail	DP	T2	N1	M0	IIB	Poor
Validation cohort 2	IHC	M	67	Head	PD	T4	N2	M0	III	Poor
Validation cohort 2	IHC	F	54	Body/tail	DP	T4	N1	M0	III	Poor
Validation cohort 2	IHC	F	66	Body/tail	Appleby	T4	N2	M0	III	Poor
Validation cohort 2	IHC	M	70	Body/tail	DP	T2	N1	M0	IIB	Poor
Validation cohort 2	IHC	M	65	Head	PD	T2	N0	M0	IB	Poor
Validation cohort 2	IHC	M	63	Body/tail	DP	T2	N0	M0	IB	Poor
Validation cohort 2	IHC	F	76	Head	PD	T2	N2	M0	III	Poor
Validation cohort 2	IHC	M	59	Head	PD	T2	N0	M1	IV	Well-moderate
Validation cohort 2	IHC	M	74	Head	PD	T2	N2	M0	III	Poor
Validation cohort 2	IHC	M	58	Body/tail	DP	T2	N1	M0	IIB	Poor
Validation cohort 2	IHC	M	64	Head	PD	T3	N1	M0	IIB	Poor
Validation cohort 2	IHC	F	60	Head	PD	T4	N2	M0	III	Well-moderate
Validation cohort 2	IHC	F	59	Head	PD	T2	N1	M0	IIB	Poor
Validation cohort 2	IHC	M	76	Body/tail	DP	T2	N0	M1	IV	Poor
Validation cohort 2	IHC	M	68	Head	PD	T2	N0	M0	IB	Poor
Validation cohort 2	IHC	M	56	Head	PD	T4	N1	M0	III	Poor
Validation cohort 2	IF	M	75	Head	PD	T1	N0	M0	IA	Well-moderate
Validation cohort 2	IF	F	45	Body/tail	DP	T4	N1	M0	III	Poor
Validation cohort 2	IF	M	69	Body/tail	DP	T3	N0	M1	IV	Poor
Validation cohort 2	IF	F	57	Body/tail	Appleby	T4	N1	M0	III	Poor
Validation cohort 2	Spatial transcriptomics	M	76	Body/tail	Appleby	T4	N0	M0	III	Well-moderate
